# Supplementary material
Source: Research Square preprint supplement (doi:10.21203/rs.3.rs-8604514/v1)
Supplement: Supplementary file 1 [file b65a66cb763c5194d51c1508.docx]

**Title:** Slingshot-1 (SSH1) phosphatase Controls Cytoskeletal Remodeling, Integrin conformation and Metabolic Reprogramming During CD4 T Cell Activation

**Authors:** Álvaro Gómez-Morón 1,2, Marta Lozano-Prieto 1,3, Camila Scagnetti 1,4, Carlos Carrasco-Padilla 2, Lidia Marín-Algeciras 1, Óscar Aguilar-Sopeña 2, Francisco Sánchez-Madrid 1,3, Pedro Roda-Navarro 2, #,* and Noa BeatrizMartín-Cófreces 1,3,4, #,*

**Affiliations**

1 Immunology Service, Instituto de Investigación Sanitaria del Hospital Universitario La Princesa, IIS- Princesa, UAM. 28006 Madrid, Spain

2 Department of Immunology, Ophthalmology and ENT, School of Medicine, Universidad Complutense de Madrid and 12 de Octubre Health Research Institute (imas12), 28040. Madrid, Spain

3 CIBER de Enfermedades Cardiovasculares (CIBERCV), Madrid, Spain.

4 Videomicroscopy Unit, Instituto de Investigación Sanitaria del Hospital Universitario La Princesa, IIS-Princesa, UAM. 28006 Madrid, Spain

# These authors jointly supervised the work

* Corresponding authors: [noa.martin@salud.madrid.org,](mailto:noa.martin@salud.madrid.org) [proda@ucm.es](mailto:proda@ucm.es)

Address:

Noa Beatriz Martín-Cófreces

Instituto de Investigación Sanitaria del Hospital Universitario La Princesa (IIS-Princesa)

Servicio de Inmunología, Planta 1ª

Hospital Universitario de La Princesa

Calle Diego de León, 62. 28006 Madrid, Spain


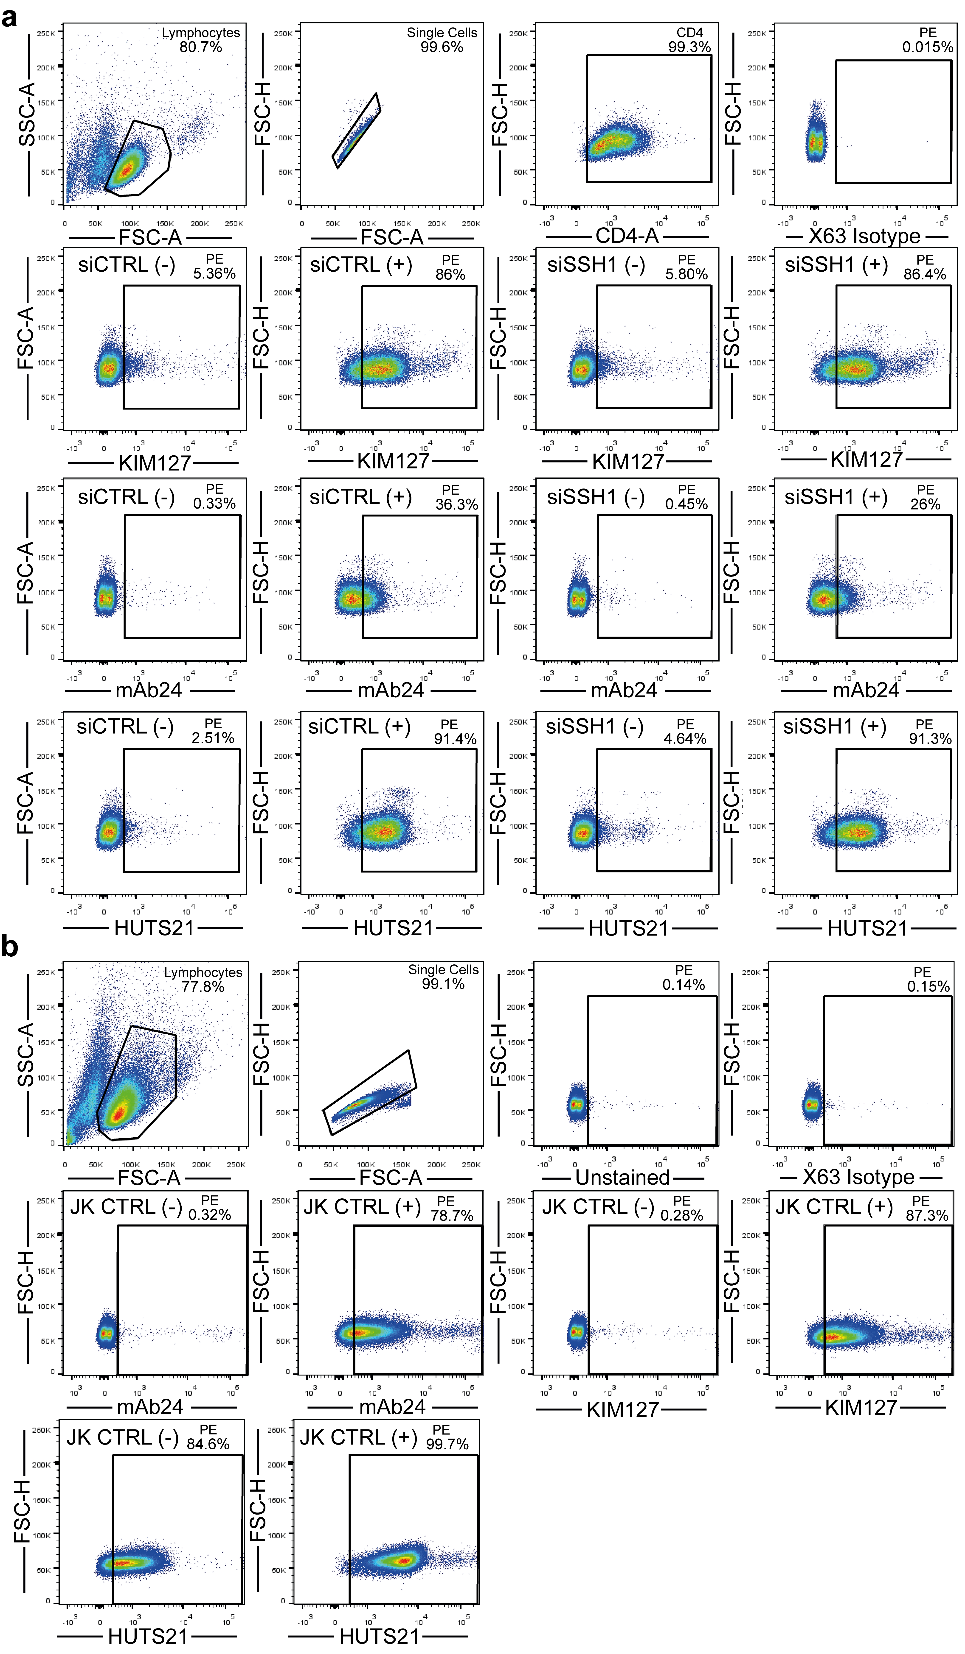


**Supplementary Fig. 1 Flow cytometry gating strategy used to study LFA-1 and VLA-4 integrins activation in human primary CD4 T cells and JK T cells. a** Human primary CD4 T cells isolated from buffy coats are gated using lymphocytes > singles cells > CD4 positive cells. X63 isotype control and mAb24, KIM127 or HUTS21 antibodies, unstimulated or stimulated over anti-CD3/anti-CD28 monoclonal antibodies-coated plates are shown in siCTRL or siSSH1 transfected human CD4 T cells. **b** JK T cells unstained, x63 isotype control and mAb24, KIM127 or HUTS21 antibodies, unstimulated or stimulated over anti-CD3/anti-CD28 monoclonal antibodies-coated plates are shown.


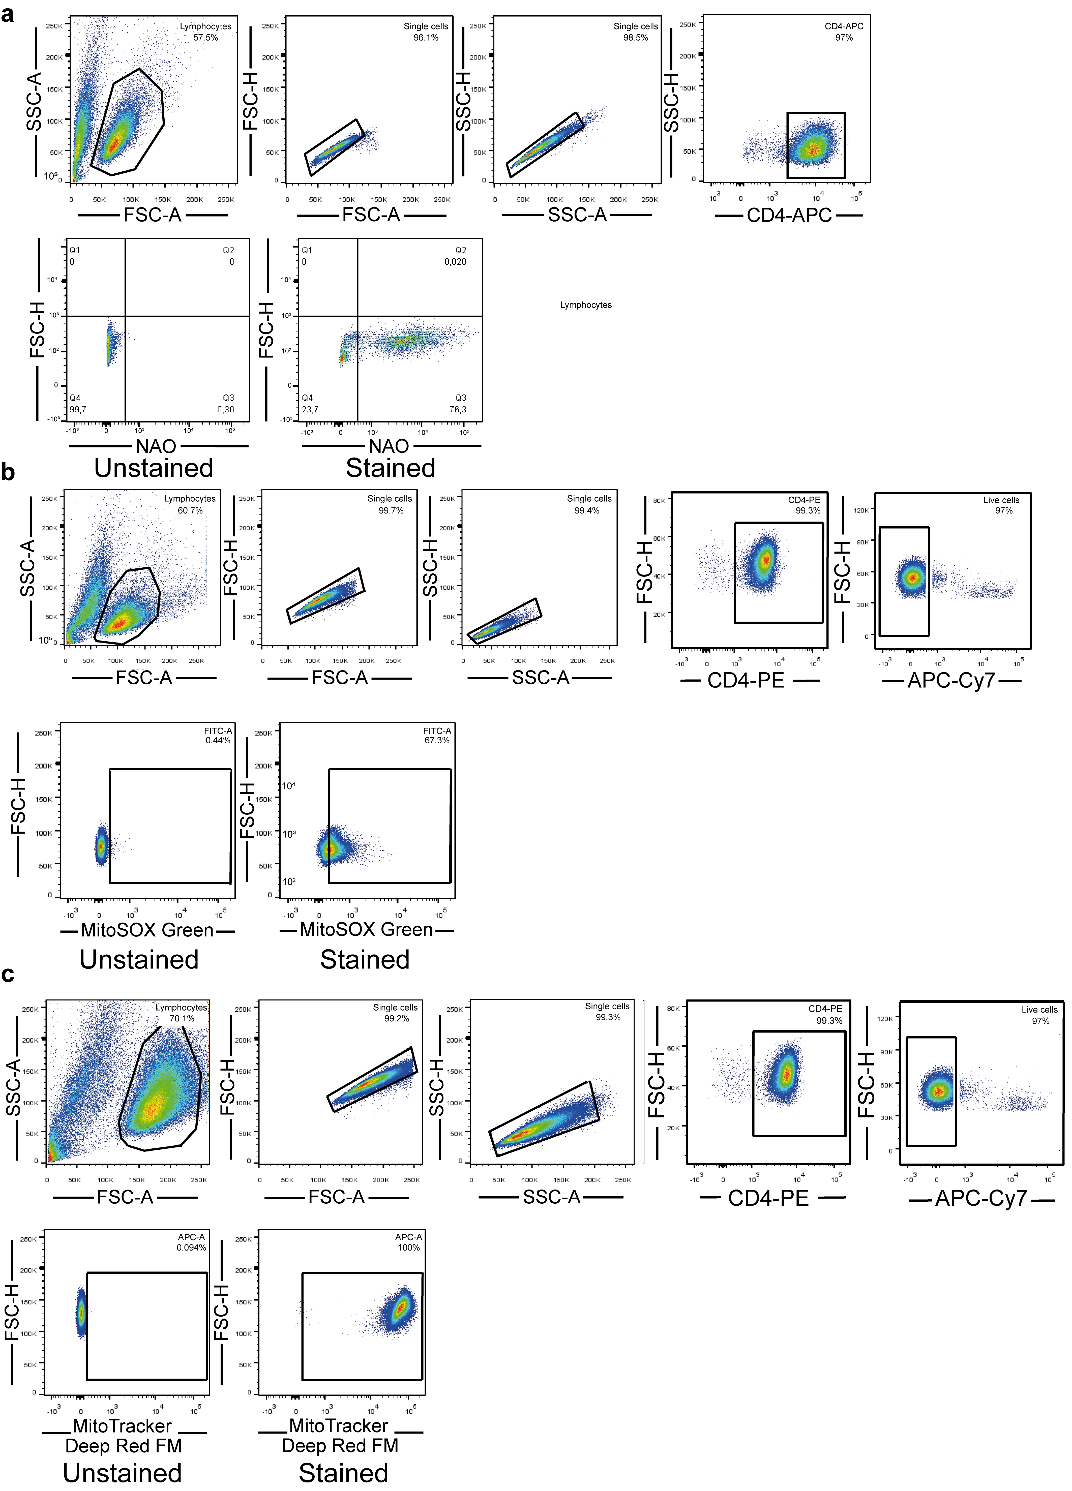


**Supplementary Fig. 2 Flow cytometry gating strategy used to study nonyl-acridinge orange (NAO), mitoSOX Green and MitoTracker Deep Red FM** **in human primary CD4 T cells and JK T cells. a** Human primary CD4 T cells isolated from buffy coats are gated using lymphocytes > singles cells > CD4 positive cells. Unstained and NAO stained transfected human CD4 T cells are shown. **b** Human primary CD4 T cells isolated from buffy coats are gated using lymphocytes > singles cells > CD4 positive cells > live cells. mitoSOX Green stained transfected human CD4 T cells are shown. **c** Human primary CD4 T cells isolated from buffy coats are gated using lymphocytes > singles cells > CD4 positive cells > live cells. MitoTracker Deep Red FM stained transfected human CD4 T cells are shown.


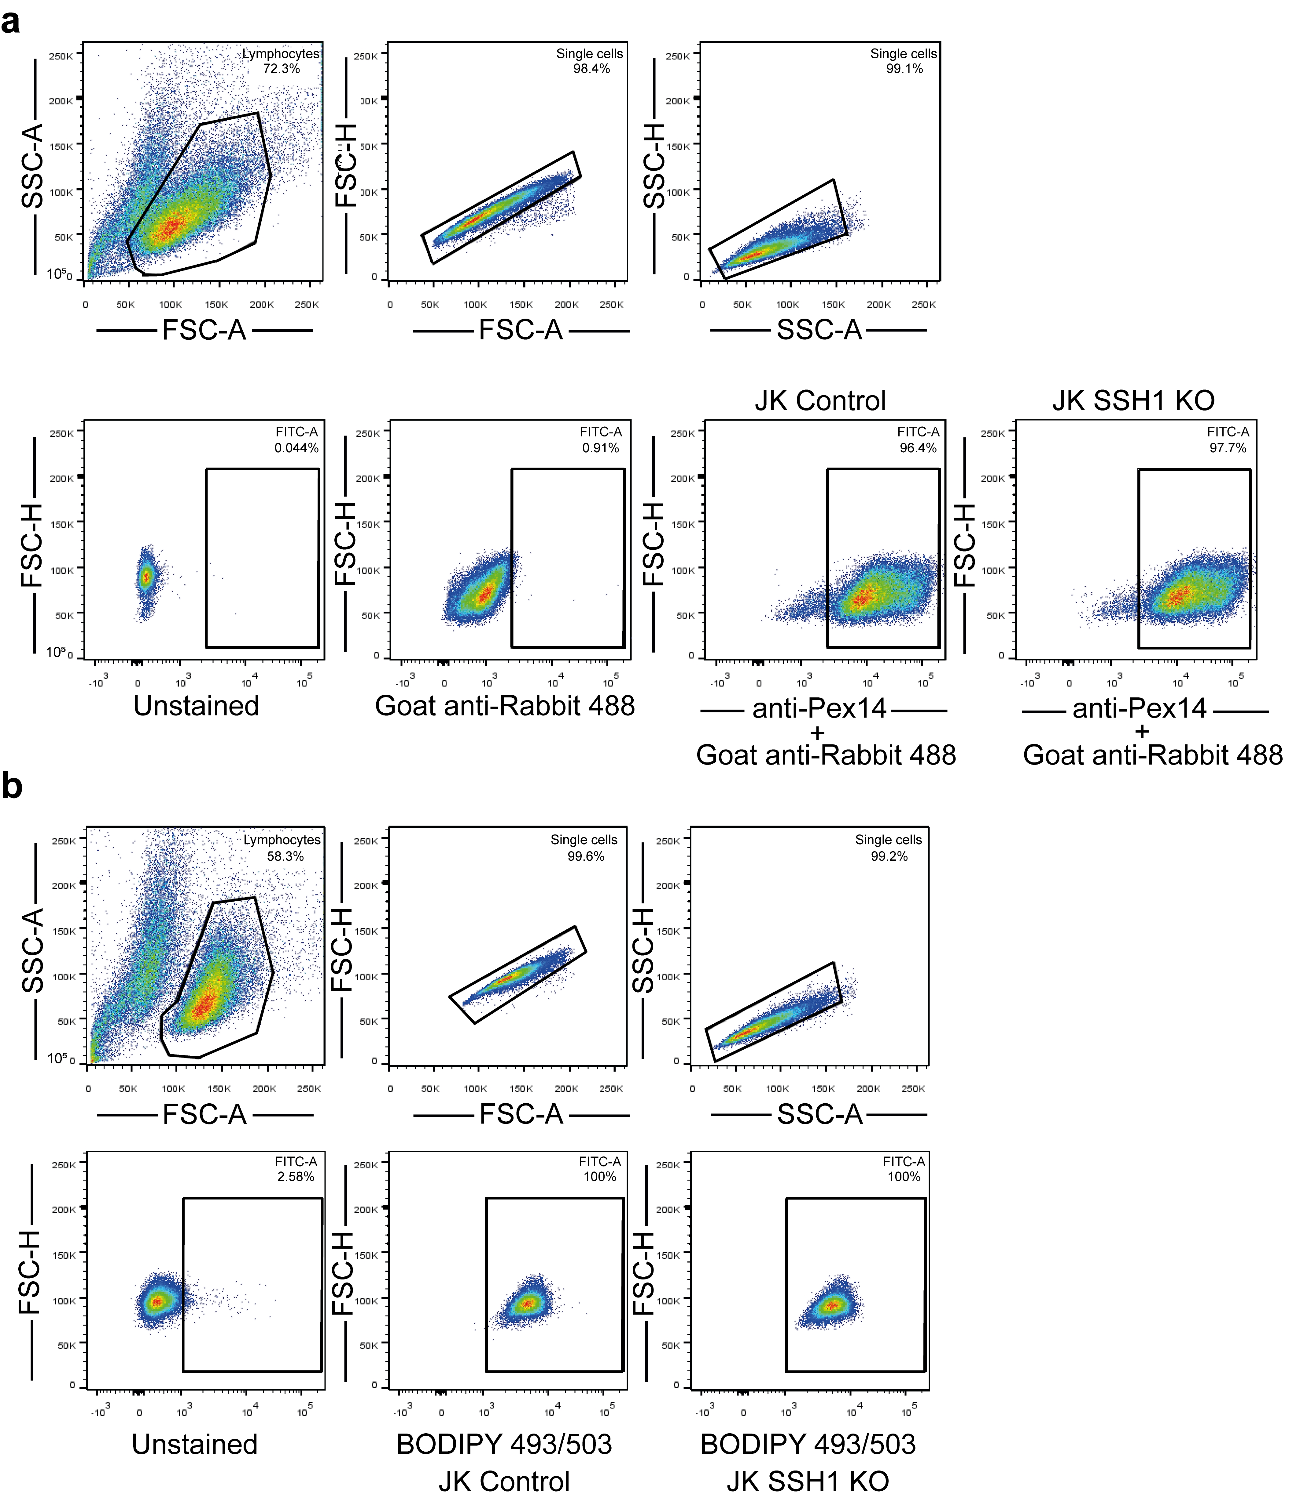


**Supplementary Fig. 3 Flow cytometry gating strategy used to study Pex14 for peroxisome detection and Bodipy 493/503 for neutral lipids analysis in JK T cells. a** Control and *SSH1* KO JK T cells unstained, stained with goat anti-rabbit 488 secondary antibody control and with anti-Pex14 plus followed by anti-rabbit 488 secondary antibody are shown. **b** Control and *SSH1* KO JK T cells unstained and stained with Bodipy 493/503 are shown.
